anesthesia equipment than to the practicing anesthesiologist. However, it contains a vast amount of information, some of which would be very difficult to find elsewhere, and in particular the chapters on the "Requirement and Problems in the Design of Vaporizers" and "Anesthesia Breathing Systems," can only be rated excellent.

Seemingly in accordance with the practice of this particular series of textbooks, there is no index. This has been supplanted by an appendix consisting of 30 pages of photographs of various anesthetic machines, vaporizers, valves, etc., to familiarize the reader with what is available not only in the United States, but also in Europe.

It is noticeable that there was no chapter on oxygen alarm systems. Since these are now beginning to become standard equipment on anesthesia machines in this country, this would now seem necessary (no doubt a second edition will contain a chapter on them). This well-written book would be valuable for the library of any anesthesiology department or for the designer of anesthetic equipment, but it may be a little too detailed for the average anesthesiologist.

EDWARD CARDEN, M.D.  
University of North Carolina  
School of Medicine  
Chapel Hill, North Carolina

**Management of Cardiac Arrest under Hospital Conditions for the Resident House Officer.** BY JOHN S. M. ZORAB. Edinburgh and London, Churchill Livingstone, 1972. Pp. 57. 50 p. (approximately \$1.26). Accompanying cassette 1b 1.50 (approximately \$3.78). Either cassette or book may be ordered separately from Churchill Livingstone, 23 Ravelston Terrace, Edinburgh EH43TL or their local supplier.

This primary teaching package consists of a 40-minute cassette tape and an accompanying soft-cover text. It is intended that the learner peruse the text (as it offers essential visual and other information) while simultaneously listening to the tape recording. The subject is approached in a basic, simple manner, and each subdivision is repetitively dealt with but each time in greater detail. The proper priorities to be recognized in the management of cardiac arrest are particularly stressed. As an example, the author stresses that unconsciousness in conjunction with absence of a major pulse is all that is necessary to initiate resuscitative efforts; assessment of respiratory activity, heart sounds, skin color and pupil size being irrelevant and time-consuming under such circumstances. Primary and secondary procedures are outlined and information on the organization of a hospital resuscitation service, pharmacologic therapy, defibrillation techniques and post-resuscitative care is supplied. Although there exists already a great abundance of teaching aids, including films and literature, on this subject, this tape/booklet format is highly recommended, as it permits the learner to proceed or review the material presented at his own pace and without the need for supervising personnel or the presence of more complex and expensive aids. Although it is intended for the instruction of resident house officers or their American equivalents, its approach is sufficiently basic to be used in training of medical students, nurses, respiratory therapists, and all other paramedical personnel who might be expected to be involved at some level in cardiopulmonary care.

Accordingly, its inclusion in any medical or paramedical teaching resource area is recommended.

G. DOUGLAS BLENKARN, M.D.  
Department of Anesthesiology  
Duke University  
Durham, North Carolina

### Books Received

A number but not all of these volumes will subsequently be reviewed. It is hoped that this listing will serve as a reference source for anesthesia and related literature—M.H.H.

**International Symposium on Malignant Hyperthermia.** EDITED BY R. A. GORDON, BEVERLEY A. BRIGHT, AND WERNER KALOW. Springfield, Charles C. Thomas, 1973. Pp. 459, illus. \$22.50.

**Chinese Acupuncture.** BY DR. WU WEI-P'ING. New York, The British Book Centre, Inc., 1973. Pp. 191, illus. \$10.00.

**Local Anaesthesia in Dentistry: Dental Practitioner Handbook No. 14.** BY GEOFFREY L. HOWE AND F. IVOR H. WHITEHEAD. Baltimore,

The Williams and Wilkins Company, 1972. Pp. 89, illus. \$9.75.

**Functional Anatomy of the Newborn.** BY EDMUND S. CRELIN. New Haven, Yale University Press, 1973. Pp. 87, illus. \$8.00; \$3.95 paper.

**A Nurse's Guide to Anaesthetics, Resuscitation and Intensive Care.** Fifth edition. BY WALTER NORRIS AND DONALD CAMPBELL. Baltimore, The Williams and Wilkins Company, 1972. Pp. 181, illus. 112. \$11.00.

**The Philosophy of Evidence.** Volume 3, Philosophy and Technology of Drug Assessment. EDITED BY JOSEPH D. COOPER. Washington, The Interdisciplinary Communication Associates, Inc., 1972. Pp. 296. \$8.50.

- Acta Neurochirurgica Supplementum 19** Zentrale Störungen der Temperaturregulation. By G. LAUSBERG. Vienna, Springer-Verlag, 1972. Pp. 168, illus. 68. \$25.40.
- Advances in Respiratory Care and Physiology.** EDITED BY THOMAS B. CALDWELL, III, AND FRANK MOYA. Springfield, Ill., Charles C Thomas, 1973. Pp. 362. Illus. \$16.75.
- Veterinary Anesthesia.** By WILLIAM V. LUMB AND E. WYNN JONES. Philadelphia, Lea and Febiger, 1973. Pp. 680. Illus. \$29.50.
- Blood Gases: Hemoglobin, Base Excess and Mal-distribution.** By ALBERT J. OLSZOWKA, HERMANN RAHN, AND LEON E. FARHI. Philadelphia, Lea and Febiger, 1973. Pp. 170. Illus. \$8.50.
- Principles of Intensive Care.** By E. R. J. EMERY, A. K. YATES, AND P. J. MOORHEAD. London, The English Universities Press Ltd, 1973. Pp. 168. Illus. Boards ed. \$22.45, Unibook ed. \$13.35.
- Introduction to Life Support.** EDITED BY MARK B. RAVIN AND JEROME H. MODELL. Boston, Little, Brown and Company, 1973. Pp. 183. Illus. \$6.95 paperback.
- Acupuncture Therapy: Current Chinese Practice.** By LEONG T. TAN, MARGARET Y. -C. TAN, AND ILZA BEITH. Philadelphia, Temple University Press, 1973. \$15.00.
- Acupuncture Handbook.** Second revised edition. By DENIS LAWSON-WOOD AND JOYCE LAWSON-WOOD. New York, The British Book Centre, Inc., 1973. Pp. 141. Illus. \$7.95.
- Disorders of the Respiratory System.** By GORDON CUMMING AND STEPHEN J. SEMPLE. Philadelphia, F. A. Davis Company, 1973. Pp. 576. Illus. \$22.75 paperback, \$31.50 cloth.
- Clinical Anesthesia Series. Volume 9, nos. 2 and 3: Monitoring in Anesthesia.** EDITED BY WILLIAM H. L. DORNETTE. Philadelphia, F. A. Davis Company, 1973. Pp. 444. Illus. \$20.00 cloth.
- Respiratory Technology: A Procedure Manual.** By DORIS L. HUNSINGER, KARL J. LISNERSKI, JEROME J. MAURIZI, MARY L. PHILLIPS. Reston, Reston Publishing Company, Inc., 1973. Pp. 278. Illus. \$12.95.
- Acid-Base Balance. Chemistry, Physiology, Patho-physiology.** By A. GORMAN HILLS. Baltimore, Williams and Wilkins, 1973. Pp. 381. Illus. \$19.50.
- Sickle Cell Hemoglobin: Molecule to Man.** By MAKIO MURAYAMA AND ROBERT M. NALBANDIAN. Boston, Little, Brown and Company, 1973. Pp. 198. Illus. \$16.50 cloth.
- Anesthesiology: Progress since 1940.** By E. M. PAPPER, S. H. NGAI, AND LESTER C. MARK. Coral Gables, Florida, University of Miami Press, 1973. Pp. 192. \$7.95.

The Editor-in-Chief and the Editors of ANESTHESIOLOGY wish to thank the following consultants and referees for making available their expert knowledge in reviews of manuscripts during the past six months:

M. DENNIS BARTON  
LESTER BRAND  
JOHN P. BUNKER  
JOHN BUTLER  
DONALD L. CLARK  
MARLENE COHEN  
MURDINA M. DESMOND  
JAY S. DEVORE  
HILARY DON  
N. EFTEKHAR  
EDMOND I. EGER, II  
NORIC ELLISON  
HENRY EYRING  
C. NORMAN GILLIS  
JOHN HEDLEY-WHYTE  
DONALD J. JENDEN  
J. H. KARIS  
JOAN J. KENDIG

JOHN A. KIRCHNER  
LUKE M. KITAHATA  
EDWARD LOWENSTEIN  
BRYAN E. MARSHALL  
RICHARD I. MAZZE  
JOHN D. MICHENFELDER  
ETSURO K. MOTUYAMA  
HENNING PONTOPPIDAN  
KEITH REEMTMA  
JACK REITAN  
J. RYAN  
EDWIN W. SALZMAN  
PHILIP SEEMAN  
THEODORE C. SMITH  
GEORGE E. STROBEL  
JOHN TAYLOR  
JAMES TRUDELL  
ROGER S. WILSON
